# Supplementary material for: Stiffness of the microenvironment upregulates ERBB2 expression in 3D cultures of MCF10A within the range of mammographic density
Source: PubMed Central journal article supplement (PMC4935956; doi:10.1038/srep28987), 2016-07-07
Supplement: srep28987-s1.pdf [file srep28987-s1.pdf]

Supporting information

## **Stiffness of the microenvironment upregulates ERBB2 expression in 3D cultures of MCF10A within the range of mammographic density**

Qingsu Cheng<sup>1,2</sup>, Cemal Cagatay Bilgin<sup>1</sup>, Gerald Fonteney<sup>2</sup>, Ju Han<sup>1,2</sup>, Matthew Henderson<sup>1</sup>, Hang Chang<sup>1,2</sup>, Bahram Parvin<sup>1,2,\*</sup>

1 1664 N Virginia Street, Department of Electrical and Biomedical Engineering, University of Nevada, Reno, Reno NV, 89557, USA

2 Lawrence Berkeley National Laboratory, 1 Cyclotron Road, MS-977, Life Sciences Division, Berkeley CA, 94720, USA.

\* Corresponding author:  
Bahram Parvin  
E-mail: [bparvin@unr.edu](mailto:bparvin@unr.edu)

Supplementary Table 1. Genes in Figure 4 are listed from top to the bottom.

|                        |
|------------------------|
| CTSC_ILMN_1792885      |
| EFEMP1_ILMN_1673880    |
| CHMP5_ILMN_2094166     |
| CCNC_ILMN_1798705      |
| OSTC_ILMN_1776005      |
| SC4MOL_ILMN_1689842    |
| HSD17B2_ILMN_1808713   |
| RPL10A_ILMN_1808041    |
| CYCSL1_ILMN_1663751    |
| HTATIP2_ILMN_1664303   |
| ATP5C1_ILMN_1701269    |
| SNCA_ILMN_1701933      |
| PTGES3_ILMN_1719749    |
| NHP2L1_ILMN_1709809    |
| RPL12P6_ILMN_3226244   |
| TSC22D1_ILMN_1692177   |
| STOM_ILMN_1696419      |
| HMGB1L1_ILMN_2211800   |
| MAT2B_ILMN_1680246     |
| TCP1_ILMN_1660661      |
| FABP5L2_ILMN_3178258   |
| DCN_ILMN_1768227       |
| NNMT_ILMN_1715508      |
| FABP5_ILMN_1696302     |
| FABP5_ILMN_2146761     |
| AKR1C3_ILMN_1713124    |
| BST2_ILMN_1723480      |
| MGC39900_ILMN_1731640  |
| PPIC_ILMN_2223903      |
| MGC39900_ILMN_1737283  |
| MGC39900_ILMN_1740512  |
| CKS2_ILMN_1756326      |
| ARL4A_ILMN_1775405     |
| RPL9_ILMN_1729033      |
| HIST1H2AC_ILMN_1792689 |
| EIF3CL_ILMN_3238570    |
| CAV2_ILMN_1735220      |
| ANXA2_ILMN_1711899     |
| AP3S1_ILMN_2311761     |
| YWHAZ_ILMN_1669286     |
| TUBA1A_ILMN_1742981    |
| C20orf127_ILMN_1662640 |
| ANXA3_ILMN_1694548     |
| EIF4G2_ILMN_2279635    |
| TPM3_ILMN_1697567      |
| TAGLN_ILMN_1778668     |
| PI3_ILMN_1693192       |
| PDPN_ILMN_1670490      |
| TAGLN_ILMN_2400935     |

|                        |
|------------------------|
| IFI27__ILMN_2058782    |
| IL32__ILMN_2368530     |
| CLEC2D__ILMN_1711702   |
| HMGB1L1__ILMN_1809439  |
| AKR1C4__ILMN_1687757   |
| AKR1C2__ILMN_2412336   |
| LGALS7__ILMN_1661708   |
| LGALS7B__ILMN_3243690  |
| SERPINE1__ILMN_1744381 |
| ANGPTL4__ILMN_2386444  |
| NDRG1__ILMN_1809931    |
| LAMC2__ILMN_1653824    |
| ADM__ILMN_1708934      |
| STC1__ILMN_1758164     |
| CA9__ILMN_1725139      |
| C10orf10__ILMN_1767556 |
| SNORD13__ILMN_1892403  |
| KLK7__ILMN_1745570     |
| LCP1__ILMN_1662932     |
| HBB__ILMN_2100437      |
| HBA2__ILMN_2127842     |
| HBA2__ILMN_1667796     |
| KRT13__ILMN_1721218    |
| MIR1978__ILMN_3310491  |

Supplementary Table 2. Network analysis partitioned the top 133 genes, in Figure 4, into four distinct functional categories.

| ID | Molecules in Network                                                                                                                                                                                                                                                                                                                                                                                                                                      | Score | Focus Molecules | Top Diseases and Functions                                                                |
|----|-----------------------------------------------------------------------------------------------------------------------------------------------------------------------------------------------------------------------------------------------------------------------------------------------------------------------------------------------------------------------------------------------------------------------------------------------------------|-------|-----------------|-------------------------------------------------------------------------------------------|
| 1  | ACTB, Alpha tubulin,ANXA2,ATP5C1,Beta Tubulin,CCNC,CFL1,ERBB2,FABP5,FOXA1,HBA1/HBA2,HBB,HES1,Histone h3,Histone-h4,Hsp70,Hsp90,HTATIP2,JAK1,KRT13,MMP25,MYOCD,NCF1,PTGES3,RNA polymerase                                                                                                                                                                                                                                                                  | 38    | 17              | Free Radical Scavenging, Cell Death and Survival, Connective Tissue Disorders             |
| 2  | II,RPL10A,RUNX2,SNCA,STOM,TAGLN,TCP1,TINF2,TPM3,TUBA1A,YWHAZ ANXA3,AP3S1,ARL4A,BAG3,BCL2,CHMP5,CKS2,CLOCK,CTSC,EIF3CL,EIF4G2,HECW2,HIST1H2AC,H MGA1,INSIG2,ISG15,KCNMA1,KLK7,LGALS7/LGALS7B,LOC728026,MAT2B,MSMO1,MYCN,NNMT, PPIC,SMAD3,SP3,TCF3,TP63,TUBG1,UBC,USP1,USP15,USP38,YY1                                                                                                                                                                      | 36    | 16              | Cancer, Organismal Injury and Abnormalities, Skeletal and Muscular Disorders              |
| 3  | AGR2,BCL2,BST2,CEBPA,DCN,EFEMP1,ERBB2,FOXA2,FOXP3,HDAC2,HES1,IFI27,IL32,KLF4,KLF5,LC P1,MTPN,NR3C1,OSTC,PDPN,PI3,PIAS1,POU5F1,RELA,RUNX2,SMAD7,SMARCA2,SOX11,SRF,TAGL N,TGFB1,TMSB15B,TP63,TSC22D1,YAP1                                                                                                                                                                                                                                                   | 25    | 12              | Gene Expression, Cellular Development, Tissue Development                                 |
| 4  | 20 $\alpha$ -hydroxysteroid dehydrogenase,3(or 17) $\alpha$ -hydroxysteroid dehydrogenase,3 $\alpha$ -hydroxysteroid dehydrogenase (A-specific),ACD,ACTB,AKR1C3,AKR1C4,AKR1C1/AKR1C2,APBB1,CAV2,ERBB2,ESR1,FHL2,FOXA1,GAT A4,HNF4A,HOXC8,HSD17B2,KLF5,LGALS7/LGALS7B,MKL1,NADH or NADPH:quinone oxidoreductase,NHP2L1,NOTCH3,NUFIP1,RNA polymerase I, RNA28S5,RPL9,S100A9,SMARCA2,SNORD13,TINF2,trans-1,2-dihydrobenzene-1,2-diol dehydrogenase,UBC,USP15 | 20    | 10              | Endocrine System Development and Function, Energy Production, Small Molecule Biochemistry |

## Figure captions

Supplementary Figure 1. Heterogeneity in colony formation between days 9 and 21 remains stable. Heterogeneity is measured by percentages of colonies being classified as round versus flat.

Supplementary Figure 2. Network analyses, using IPA, for each of the four functional groups in Supplementary Table 2 are shown. (a) Network involved in free radical scavenging, cell death and survival, and connective tissue disorders. (b) Network involved in cancer, organismal injury and abnormalities, and skeletal and muscular disorders. (c) Network involved in cellular development and tissue development. (d) Network involved in endocrine system development and function, energy production, and small molecule biochemistry.

Supplementary Figure 3. Upstream analysis, using IPA, reveals ERBB2 as one of the hubs.

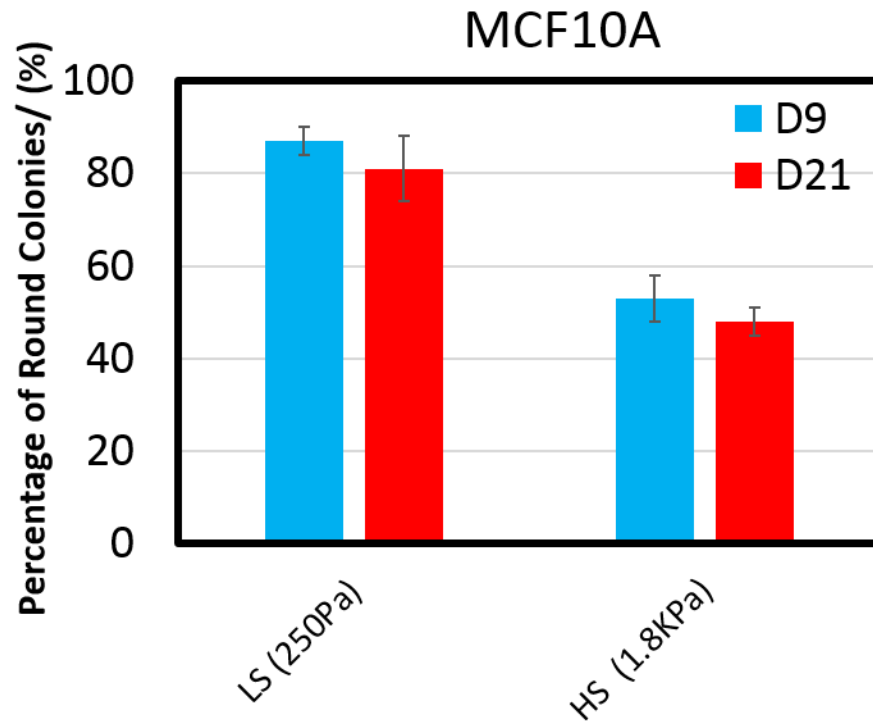

Supplementary Figure 1. Heterogeneity in colony formation between days 9 and 21 remains stable. Heterogeneity is measured by percentages of colonies being classified as round versus flat.

a

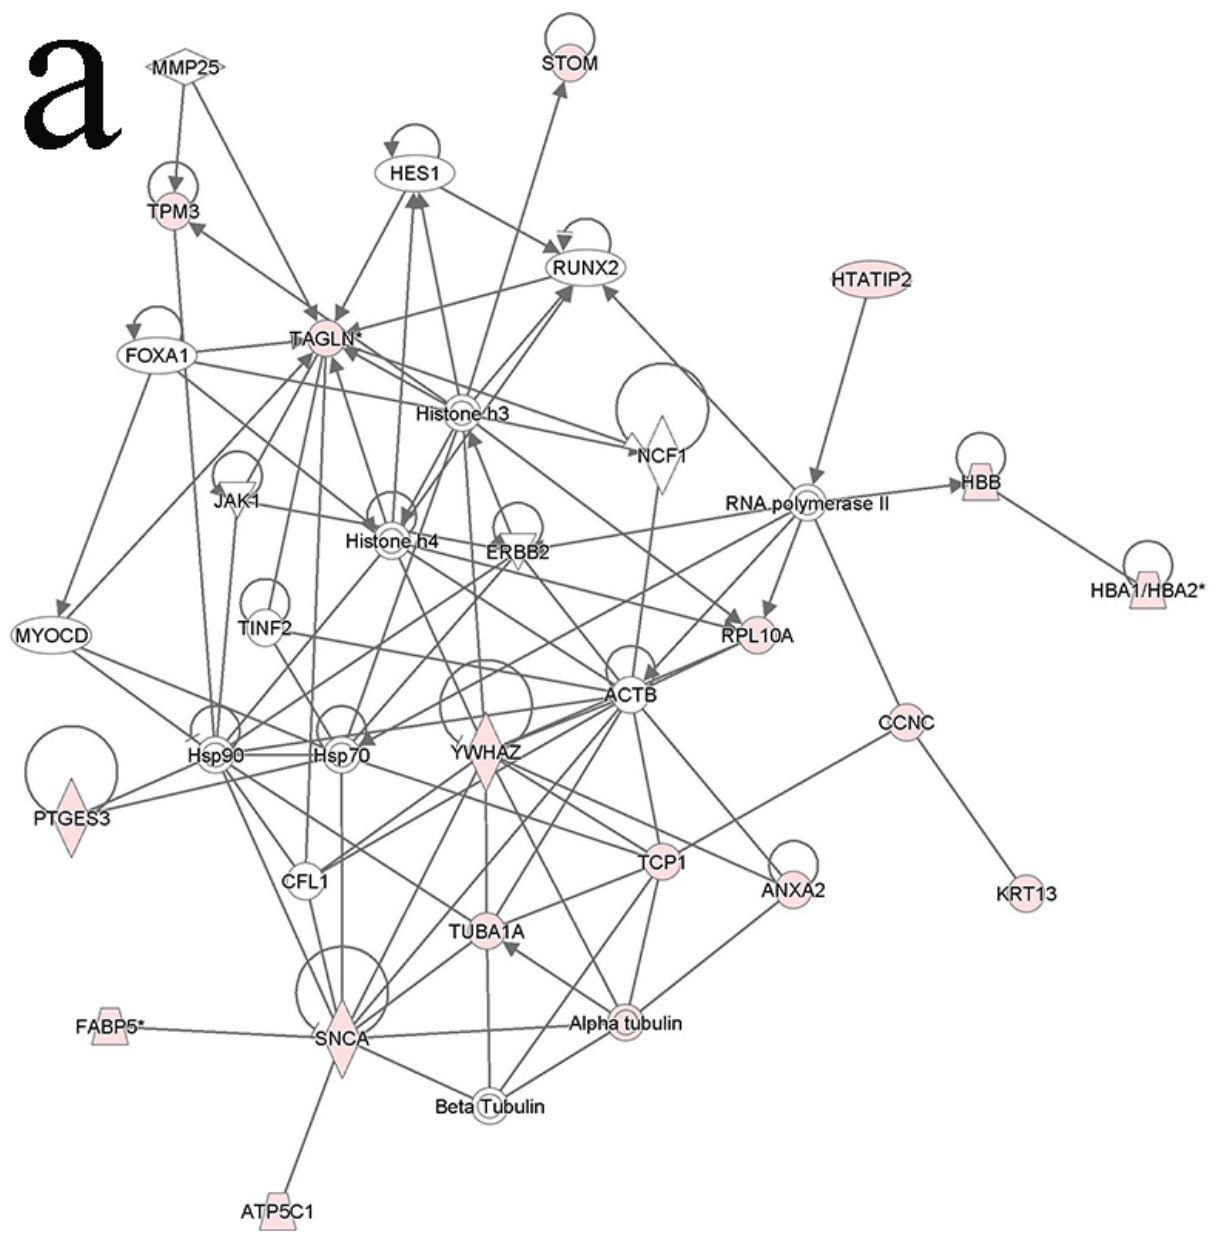

b

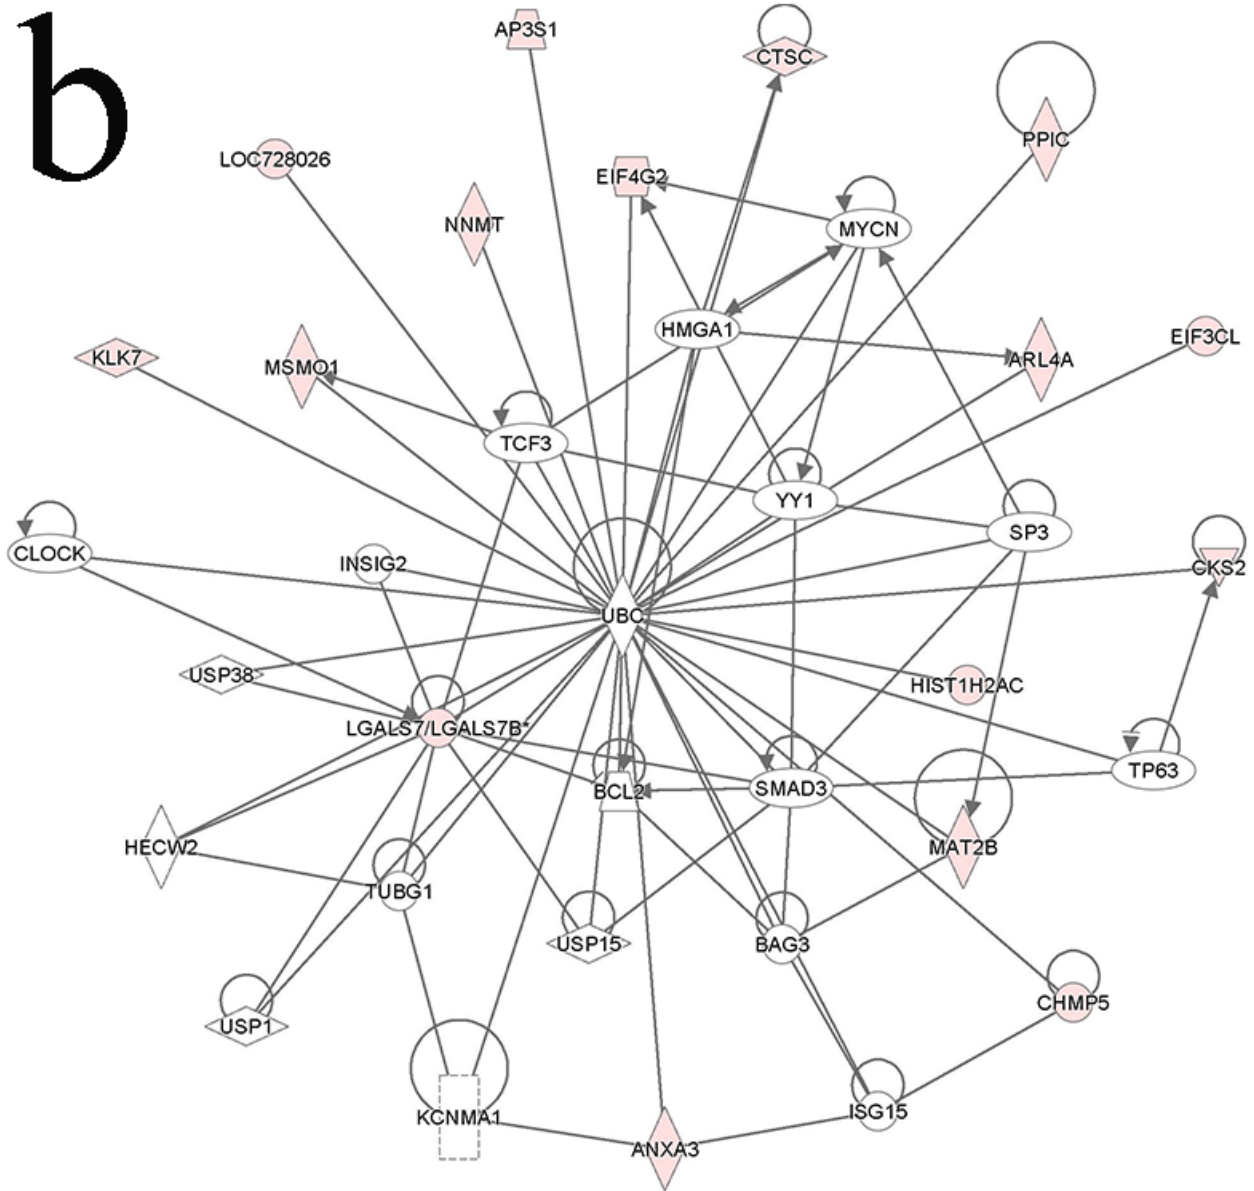



# C

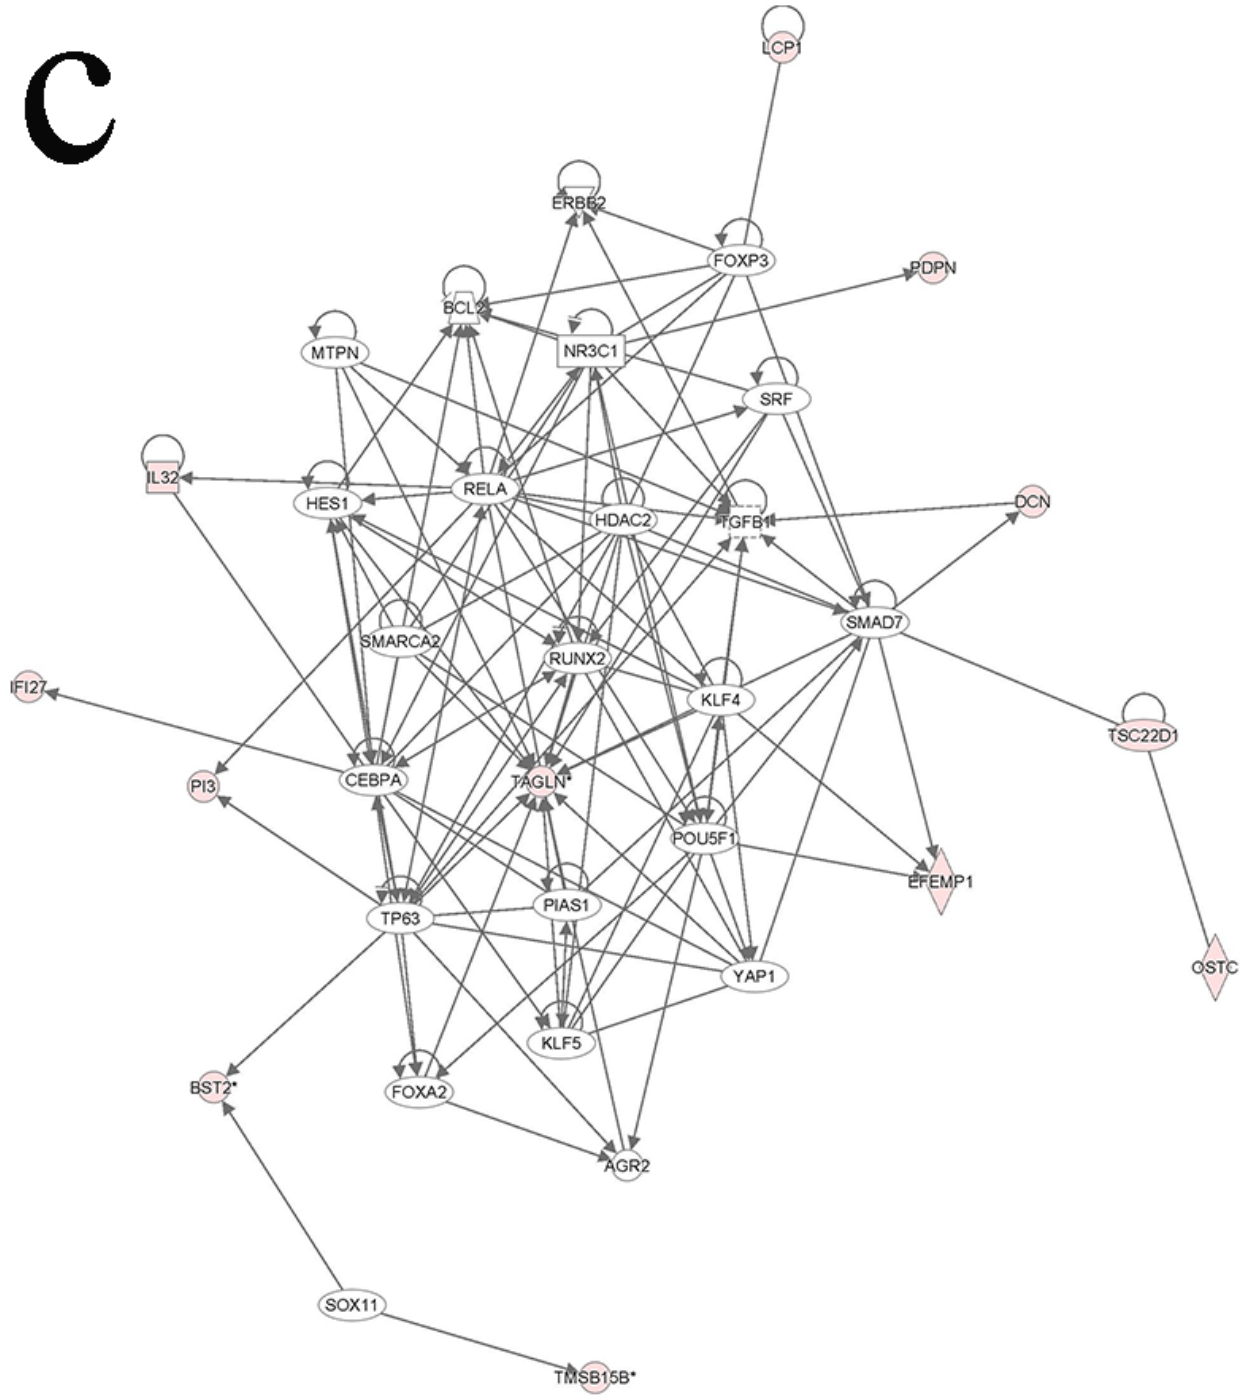

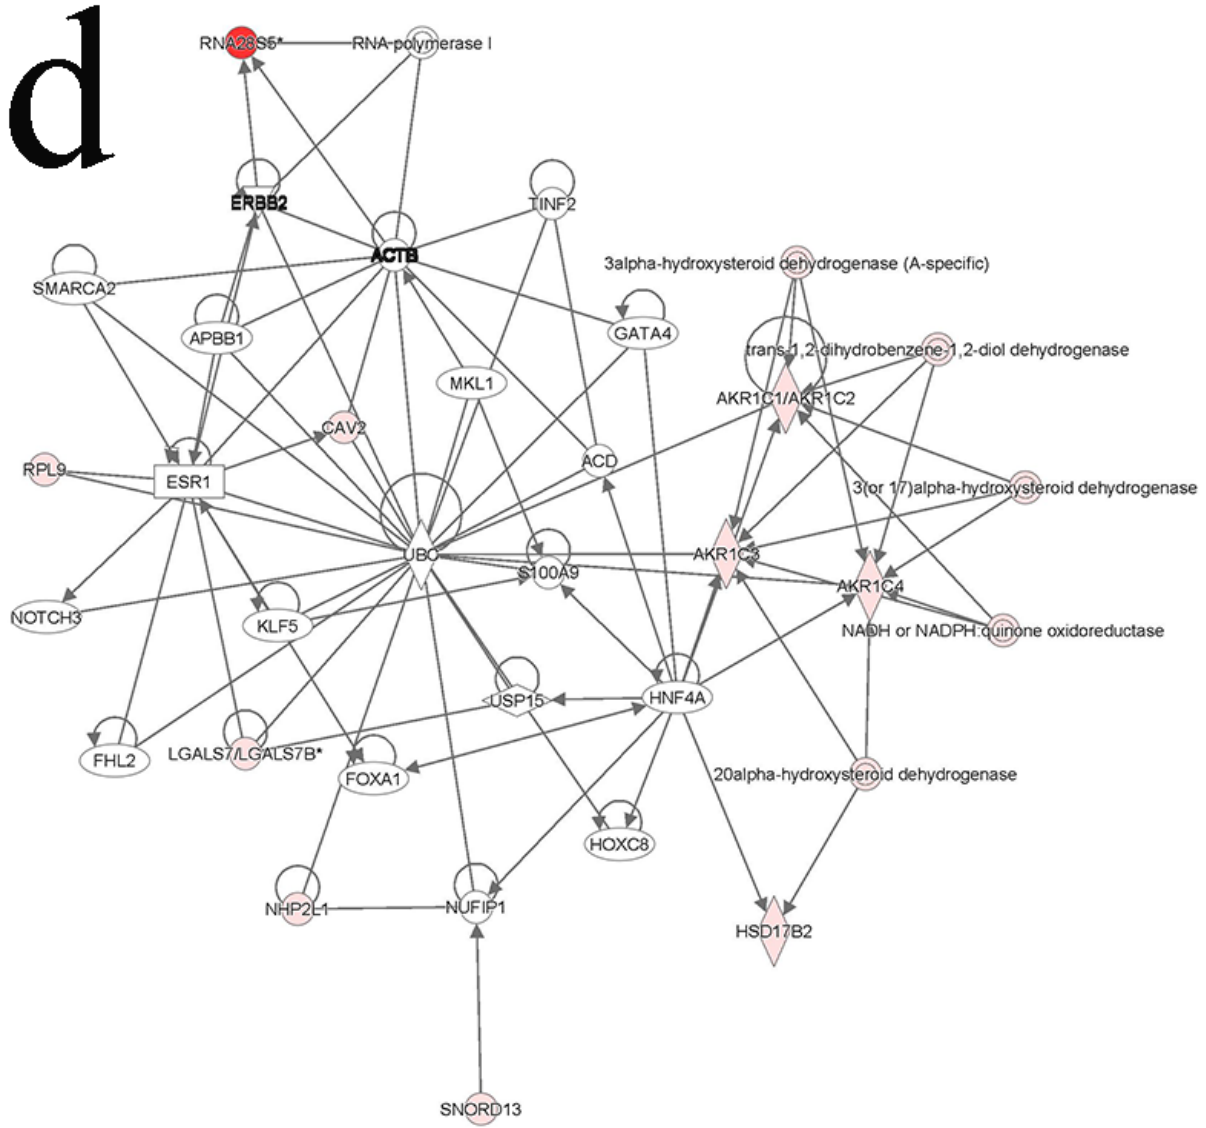

Supplementary Figure 2. Network analyses, using IPA, for each of the four functional groups in Supplementary Table 2 are shown. (a) Network involved in free radical scavenging, cell death and survival, and connective tissue disorders. (b) Network involved in cancer, organismal injury and abnormalities, and skeletal and muscular disorders. (c) Network involved in cellular development and tissue development. (d) Network involved in endocrine system development and function, energy production, and small molecule biochemistry.

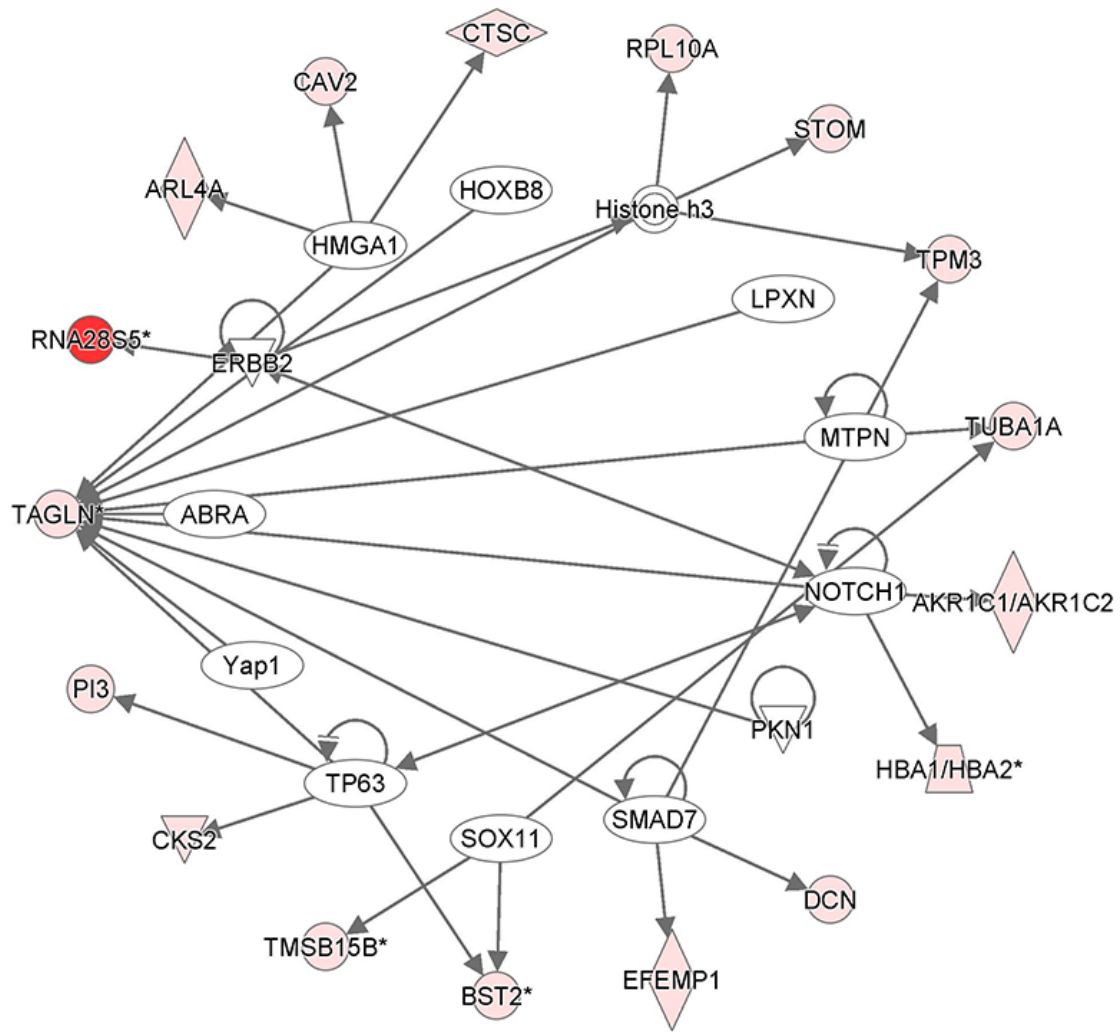

Supplementary Figure 3. Upstream analysis, using IPA, reveals ERBB2 as one of the hubs.
